# Supplementary material for: Portable rotary PCR system for real-time detection of Pseudomonas aeruginosa in milk
Source: Royal Society of Chemistry journal article supplement (doi:10.1039/d3lc00401e), 2023-01-01
Supplement: d3lc00401e1.pdf [file d3lc00401e1.pdf]

## Portable Rotary PCR system for Real-time detection of *Pseudomonas aeruginosa* in milk

Weidu Song, Chuanhao Zhang, Huichao Lin, Taiyi Zhang, Haixia Liu, Xiaowen Huang\*

State Key Laboratory of Biobased Material and Green Papermaking, Department of Bioengineering, Qilu University of  
Technology (Shandong Academy of Sciences), Jinan 250300, China

songweidu2020@126.com (W.S.); zhangchuanhao66@126.com (C.Z.); linhuichao2020@gmail.com (H.L.);  
zty2020bio@126.com (T.Z.);  
10431211092@stu.qlu.edu.cn (H.L.)

\* Correspondence: [huangxiaowen2013@gmail.com](mailto:huangxiaowen2013@gmail.com)

**Table S1.** Universal PCR primer sequence for identification of bacteria and PCR primer  
sequence for identification of *Pseudomonas*.

| Category                                                              | Primer Name | Sequences            |
|-----------------------------------------------------------------------|-------------|----------------------|
| Universal PCR primer<br>sequence for<br>identification of<br>bacteria | 27F         | AGAGTTTGATCCTGGCTCAG |
|                                                                       | 1492R       | TACGACTTAACCCCAATCGC |
| PCR primer sequence<br>for identification of<br><i>Pseudomonas</i>    | Lectin-F    | CAAACCGGAGGAAGGTGG   |
|                                                                       | Lectin-R    | GCGATTCCGACTTCACGC   |

**Figure S1** Structure of a portable centrifuge for capillary tubes.

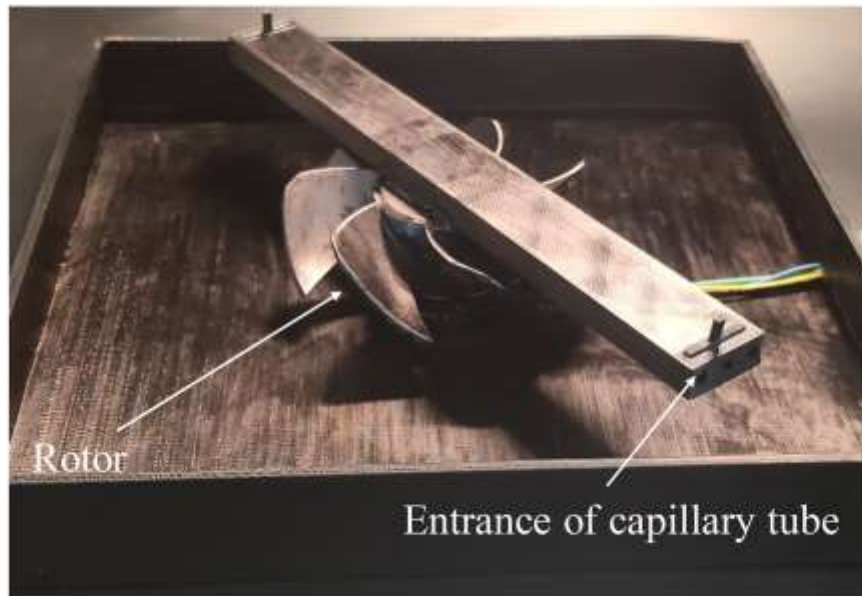

**Figure S2** Blast results of PCR amplified product with 16s rRNA gene as template.

**Pseudomonas aeruginosa strain sE6 16S ribosomal RNA gene, partial sequence**  
Sequence ID: [OP060725.1](#) Length: 1441 Number of Matches: 1

Range 1: 6 to 1436 [GenBank](#) [GenBank](#) [+](#) [View Match](#) [+](#) [Close Match](#)

| Score            | Expect                                                      | Identities     | Gaps       | Strand    |
|------------------|-------------------------------------------------------------|----------------|------------|-----------|
| .2612 bits(1414) | 0.0                                                         | 1426/1431(99%) | 3/1431(0%) | Plus/Plus |
| Query 4          | TGG-GG-AGTCACACATGCACTGGAGCCGATGAAGGGAGCTTGCTCCTGGATTCAGGGG |                |            | 61        |
| Subject 6        | TGGGGCCAGCCACACATGCACTGGAGCCGATGAAGGGAGCTTGCTCCTGGATTCAGGGG |                |            | 65        |
| Query 62         | GGAGGGGTCAGTAATGCTTAGGAATCTGCCTGCTAGTGGGGATAAAGCTCGGAAAAGG  |                |            | 121       |
| Subject 66       | GGAGGGGTCAGTAATGCTTAGGAATCTGCCTGCTAGTGGGGATAAAGCTCGGAAAAGG  |                |            | 125       |
| Query 122        | GGCTAATACCCGATACGTCCTGAGGAGAAAGTGGGGATCTTCGGACTCAGGCTATC    |                |            | 181       |
| Subject 126      | GGCTAATACCCGATACGTCCTGAGGAGAAAGTGGGGATCTTCGGACTCAGGCTATC    |                |            | 185       |
| Query 182        | AGATGAGCCTAGCTGGATTAGCTAGTTGGTGGGTAAAGGCTACCAAGCGACGATCC    |                |            | 241       |
| Subject 186      | AGATGAGCCTAGCTGGATTAGCTAGTTGGTGGGTAAAGGCTACCAAGCGACGATCC    |                |            | 245       |
| Query 242        | GTAACTGGTCGAGAGGATGATCACTGCACTGGAACTGAGACAAGTCCAGACTCTAC    |                |            | 301       |
| Subject 246      | GTAACTGGTCGAGAGGATGATCACTGCACTGGAACTGAGACAAGTCCAGACTCTAC    |                |            | 305       |
| Query 302        | GGAGGCAGCAGTGGGAAATTTGGAGCAATGGCGAAAGCTGATCCAGCCATCGCGGT    |                |            | 361       |
| Subject 306      | GGAGGCAGCAGTGGGAAATTTGGAGCAATGGCGAAAGCTGATCCAGCCATCGCGGT    |                |            | 365       |
| Query 362        | GTGTCAGCAAGCTCTTGGATTGTAAAGCACTTAAAGTGGGAGGAAAGGCGTAGTTA    |                |            | 421       |
| Subject 366      | GTGTCAGCAAGCTCTTGGATTGTAAAGCACTTAAAGTGGGAGGAAAGGCGTAGTTA    |                |            | 425       |
| Query 422        | ATAGCTTGGCTTTTGGCTTACCAACAGAAATAGCACCGCTAACTCTGTCGACGAT     |                |            | 481       |
| Subject 426      | ATAGCTTGGCTTTTGGCTTACCAACAGAAATAGCACCGCTAACTCTGTCGACGAT     |                |            | 485       |
| Query 482        | GGCGTAATACGAAAGGCTGCAAGCGTTAATGGAAATTAAGCGTAAAGCGCGTAGG     |                |            | 541       |
| Subject 486      | GGCGTAATACGAAAGGCTGCAAGCGTTAATGGAAATTAAGCGTAAAGCGCGTAGG     |                |            | 545       |
| Query 542        | TGGTTCAGCAAGTGGATGTGAAATCGTGGGCTCAACTGGGAACTGCATCCAAACTA    |                |            | 601       |
| Subject 546      | TGGTTCAGCAAGTGGATGTGAAATCGTGGGCTCAACTGGGAACTGCATCCAAACTA    |                |            | 605       |
| Query 602        | CTGAGCTAGAGTACGGTAGAGGGTGGTGGAAATTTCTGTTAGCGGTGAAATCGGTAGAT |                |            | 661       |
| Subject 606      | CTGAGCTAGAGTACGGTAGAGGGTGGTGGAAATTTCTGTTAGCGGTGAAATCGGTAGAT |                |            | 665       |
| Query 662        | ATAGCAAGCAACCCAGTGGGGAAAGCGACCTGGACTGATCTGACACTGAGGTGGG     |                |            | 721       |
| Subject 666      | ATAGCAAGCAACCCAGTGGGGAAAGCGACCTGGACTGATCTGACACTGAGGTGGG     |                |            | 725       |
| Query 722        | AAAGCGTGGGAGCAAAACAGGATTAGATACCTGGTAGTCCAGCGCTAAAGGATGTGA   |                |            | 781       |
| Subject 726      | AAAGCGTGGGAGCAAAACAGGATTAGATACCTGGTAGTCCAGCGCTAAAGGATGTGA   |                |            | 785       |
| Query 782        | CTAGCGTTGGGATCCTGAGACTCTAGTGGCGAGCTAAAGCGATAAGTGGAGCGCTG    |                |            | 841       |
| Subject 786      | CTAGCGTTGGGATCCTGAGACTCTAGTGGCGAGCTAAAGCGATAAGTGGAGCGCTG    |                |            | 845       |
| Query 842        | GGAGTAAGGCGCCAGGTTAAAACTCAATGAATGGAGGGGGCGGCACAGCGGTTGG     |                |            | 901       |
| Subject 846      | GGAGTAAGGCGCCAGGTTAAAACTCAATGAATGGAGGGGGCGGCACAGCGGTTGG     |                |            | 905       |
| Query 902        | AGCATGTGGTTAAATGGAACAAAGCGAAGAACCTTACCTGGCCTTGACATGCTGAGAA  |                |            | 961       |
| Subject 906      | AGCATGTGGTTAAATGGAACAAAGCGAAGAACCTTACCTGGCCTTGACATGCTGAGAA  |                |            | 965       |
| Query 962        | CTTCCAGAGATGGATTGGTCTTGGGAACTCAGACAGGTCGTCATGGCTGTGCT       |                |            | 1021      |
| Subject 966      | CTTCCAGAGATGGATTGGTCTTGGGAACTCAGACAGGTCGTCATGGCTGTGCT       |                |            | 1025      |
| Query 1022       | CAGCTGGTGGTGGAGATTTGGTTAAGTCCGTAACGAGCGCAACCTTGTCTTAGT      |                |            | 1081      |
| Subject 1026     | CAGCTGGTGGTGGAGATTTGGTTAAGTCCGTAACGAGCGCAACCTTGTCTTAGT      |                |            | 1085      |
| Query 1082       | TACCAGCACTGGGTTGGCACTTAAGCAGACTGGCGTGACAAACCGGAGGAGGCTGG    |                |            | 1141      |
| Subject 1086     | TACCAGCACTGGGTTGGCACTTAAGCAGACTGGCGTGACAAACCGGAGGAGGCTGG    |                |            | 1145      |
| Query 1142       | GGATGAGCTCAAGTCAATGCGCCCTTADGGCCAGGCTACACAGGTGCTACAATGGTGG  |                |            | 1201      |
| Subject 1146     | GGATGAGCTCAAGTCAATGCGCCCTTADGGCCAGGCTACACAGGTGCTACAATGGTGG  |                |            | 1205      |
| Query 1202       | GTACAAAGGTTGCCAAGCGCGAGTGGAGCTAAATCCATAAAACCGATGGTAGTCCGG   |                |            | 1261      |
| Subject 1206     | GTACAAAGGTTGCCAAGCGCGAGTGGAGCTAAATCCATAAAACCGATGGTAGTCCGG   |                |            | 1265      |
| Query 1262       | ATGGCAGTCTGCAACTGACTGGTGAAGTGGAAATGCTAGTAACTGTAATCAGAATG    |                |            | 1321      |
| Subject 1266     | ATGGCAGTCTGCAACTGACTGGTGAAGTGGAAATGCTAGTAACTGTAATCAGAATG    |                |            | 1325      |
| Query 1322       | TCAGGTTGAATGTTTTCCGGGCTTTACACACCGCCCTCACACCATGGAGTGGGTT     |                |            | 1381      |
| Subject 1326     | TCAGGTTGAATGTTTTCCGGGCTTTACACACCGCCCTCACACCATGGAGTGGGTT     |                |            | 1385      |
| Query 1382       | GCTCCAGAACTAGCTACTTAACCGCAA-GGGACCGTACCAAGGAGGATT           |                |            | 1431      |
| Subject 1386     | GCTCCAGAACTAGCTACTTAACCGCAAAGGGGAGGAGGTTACCAAGGAGGATT       |                |            | 1436      |

**Figure S3** Sequencing and blast results of PCR amplification with target gene as template.

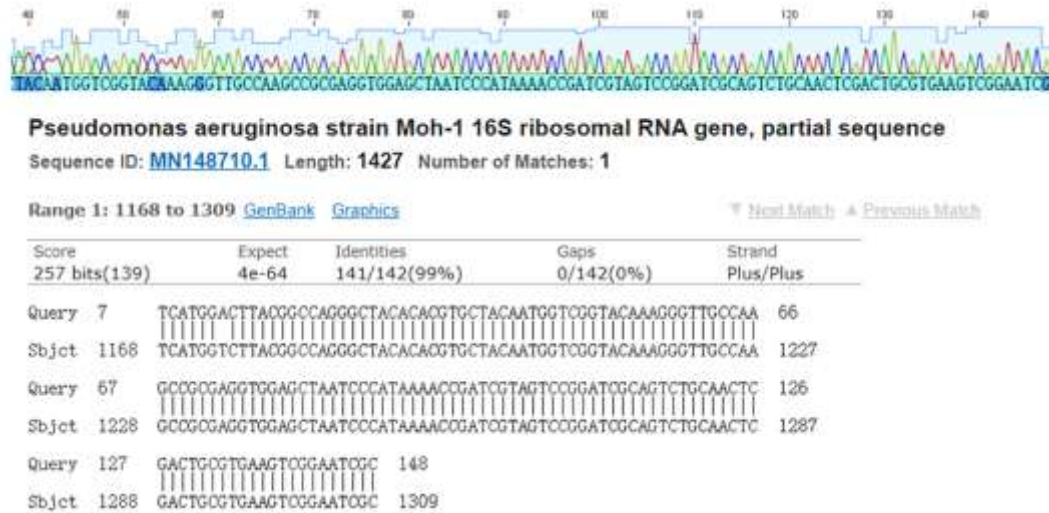

**Figure S4** Research on the temperature of the solution in the capillary tube.

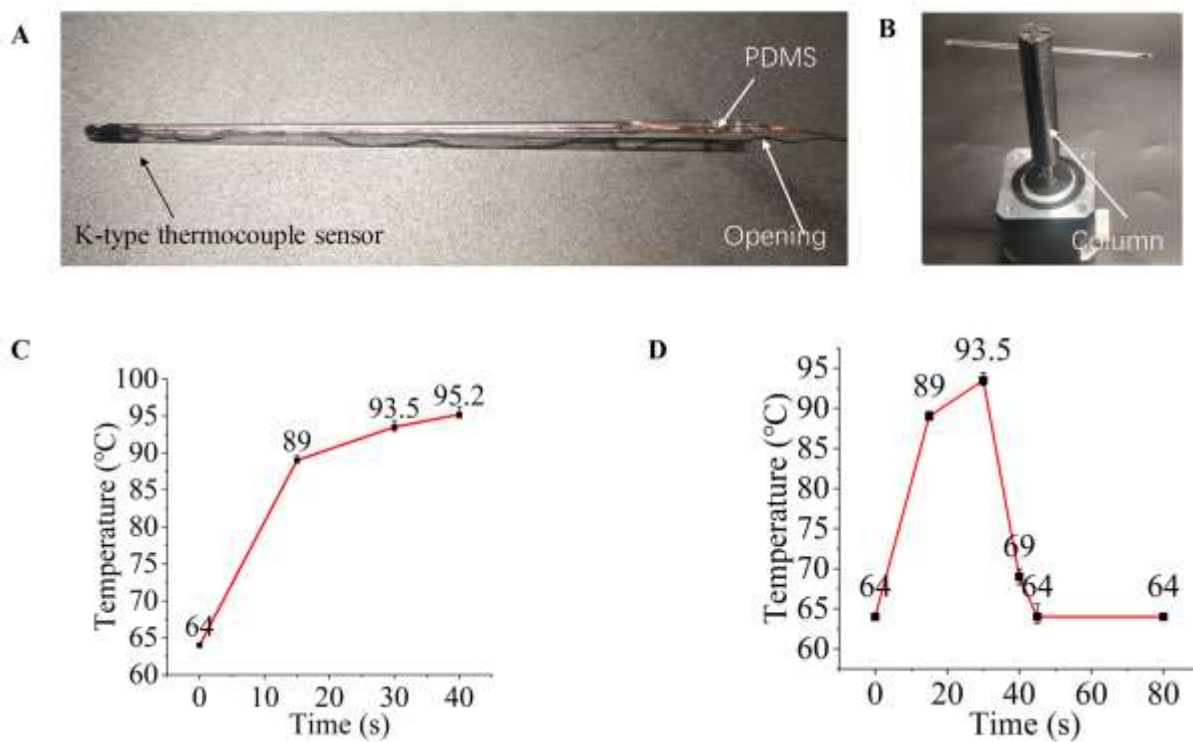

**A)** Insert the k-type thermocouple sensor into the PCR solution while sealing the outlet with PDMS. **B)** Flame melts closed capillary tube.  
**C)** Real-time temperature image of PCR solution rising from annealing/elongation temperature to denaturation temperature within the 40s.  
**D)** Real-time temperature change of one cycle.

**Figure S5** Temperature field distribution in the system between 0-1 min.

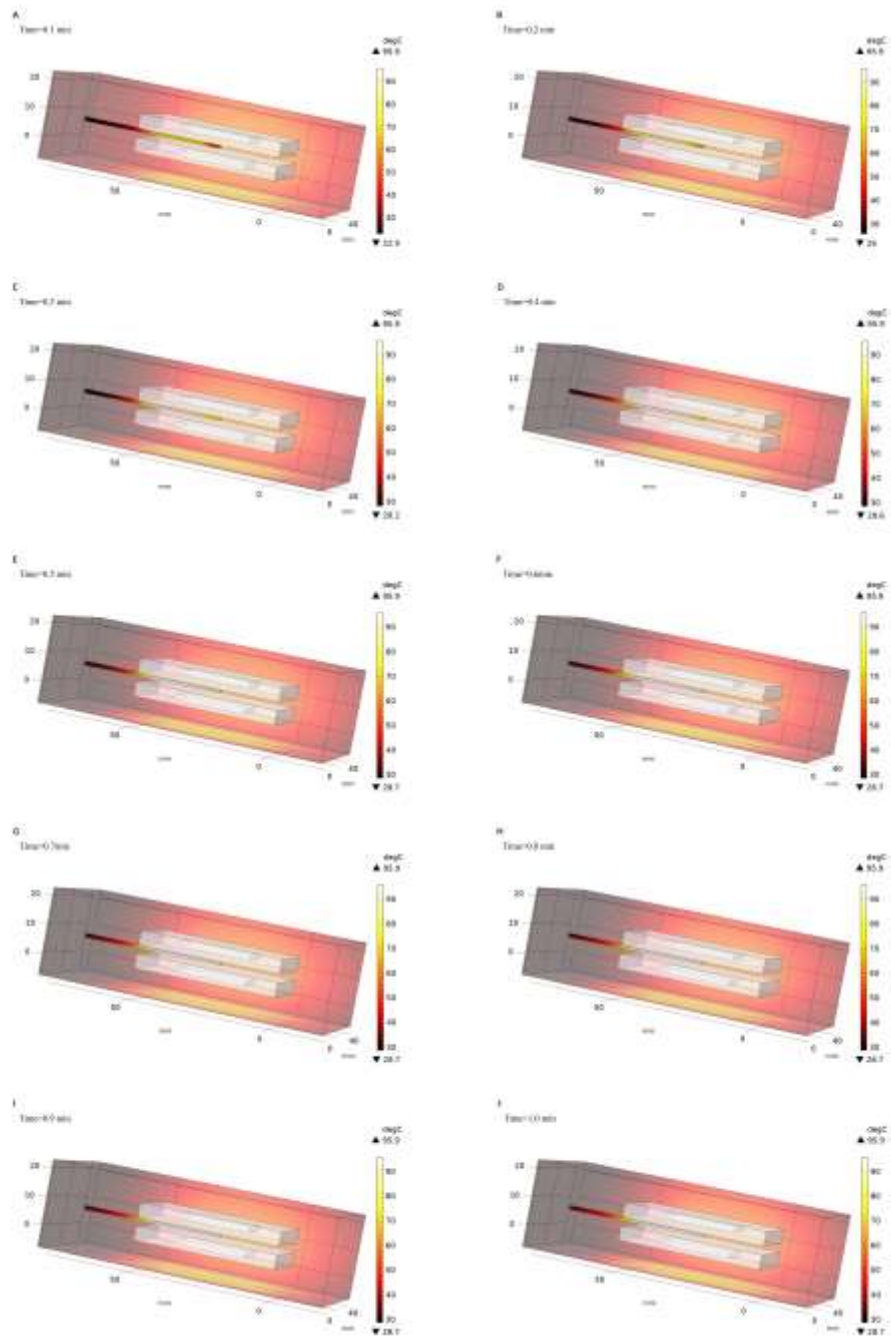

**Figure S6** Comparison of experimental and simulated curves.

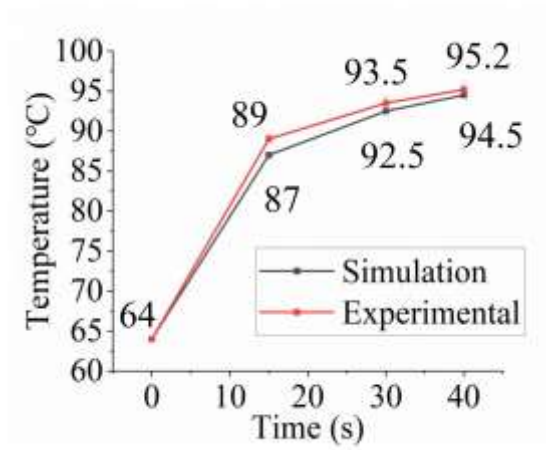

**Figure S7** Amplification curve and its CT values.

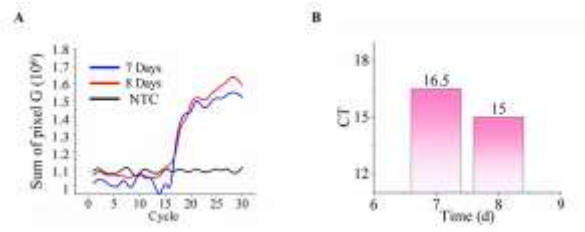

**A)** Amplification curve of *Pseudomonas aeruginosa* 16S rRNA from refrigerated milk (7 and 8 days). **B)** CT values of amplification curve.
